# Supplementary material for: The host range of Aphis gossypii is dependent on aphid genetic background and feeding experience
Source: PeerJ. 2019 Sep 27;7:e7774. doi: 10.7717/peerj.7774 (PMC6768058; doi:10.7717/peerj.7774)
Supplement: Supplemental Information 1 [file peerj-07-7774-s001.xlsx]

## Sheet: Raw data for Fig. 1 and 2
Population dynamics of six genotypes of cotton-melon aphids on cotton and cucumber host plants and excised leaves.
Raw data for Fig.1
CO-1 on cotton intact plant	Replicates				CO-2 on cotton intact plant	Replicates				CO-3 on cotton intact plant	Replicates				CU-1 on cucumber intact plant	Replicates				CU-2 on cucumber intact plant	Replicates				CU-3 on cucumber intact plant	Replicates
Day after aphids transplantation	1	2	3		Day after aphids transplantation	1	2	3		Day after aphids transplantation	1	2	3		Day after aphids transplantation	1	2	3		Day after aphids transplantation	1	2	3		Day after aphids transplantation	1	2	3
1	20	20	20		1	20	20	20		1	20	20	20		1	20	20	20		1	20	20	20		1	20	20	20
3	83	77	75		3	67	70	73		3	78	83	85		3	106	95	102		3	91	75	104		3	109	103	105
5	128	109	123		5	89	98	103		5	103	118	125		5	161	135	158		5	155	128	165		5	155	185	174
7	150	133	145		7	125	143	147		7	135	145	150		7	265	220	244		7	195	150	215		7	223	299	265
9	225	198	203		9	155	195	203		9	165	175	179		9	375	330	355		9	315	255	358		9	325	425	398
11	430	365	388		11	210	255	285		11	230	245	255		11	735	625	665		11	565	395	585		11	405	515	455
CO-1 on cucumber intact plant	Replicates				CO-2 on cucumber intact plant	Replicates				CO-3 on cucumber intact plant	Replicates				CU-1 on cotton intact plant	Replicates				CU-2 on cotton intact plant	Replicates				CU-3 on cotton intact plant	Replicates
Day after aphids transplantation	1	2	3		Day after aphids transplantation	1	2	3		Day after aphids transplantation	1	2	3		Day after aphids transplantation	1	2	3		Day after aphids transplantation	1	2	3		Day after aphids transplantation	1	2	3
1	20	20	20		1	20	20	20		1	20	20	20		1	20	20	20		1	20	20	20		1	20	20	20
3	4	1	2		3	3	4	2		3	5	0	1		3	0	0	0		3	0	0	0		3	1	7	9
5	0	0	0		5	0	4	0		5	2		0												5	6	2	3
					7		0			7	0														7	7	0	0
																									9	4
																									11	0
Raw data for Fig.2
CO-1 on cotton excised leaf	Replicates						CO-2 on cotton excised leaf	Replicates						CO-3 on cotton excised leaf	Replicates						CU-1 on cucumber excised leaf	Replicates						CU-2 on cucumber excised leaf	Replicates						CU-3 on cucumber excised leaf	Replicates
Day after aphids transplantation	1	2	3	4	5		Day after aphids transplantation	1	2	3	4	5		Day after aphids transplantation	1	2	3	4	5		Day after aphids transplantation	1	2	3	4	5		Day after aphids transplantation	1	2	3	4	5		Day after aphids transplantation	1	2	3	4	5
1	40	40	40	40	40		1	40	40	40	40	40		1	40	40	40	40	40		1	40	40	40	40	40		1	40	40	40	40	40		1	40	40	40	40	40
4	130	125	129	133	75		4	160	125	115	138	80		4	120	128	145	135	125		4	150	175	210	180	135		4	220	215	225	190	220		4	175	225	245	170	210
7	195	140	195	205	105		7	240	220	190	190	110		7	150	153	215	190	300		7	175	240	250	220	165		7	245	330	350	230	275		7	215	295	320	230	260
10	260	210	250	315	190		10	365	330	245	245	205		10	240	185	345	275	610		10	365	265	275	230	265		10	320	350	370	390	475		10	325	390	345	280	330
13	385	270	295	355	310		13	430	380	270	370	385		13	410	355	380	460	715		13	405	365	445	470	425		13	405	560	500	575	505		13	435	455	575	490	520
16	490	335	350	365	345		16	565	390	380	605	495		16	680	670	555	800	895		16	560	655	735	895	675		16	650	725	645	810	785		16	510	575	735	650	635
CO-1 on cucumber excised leaf	Replicates											CO-2 on cucumber excised leaf	Replicates											CO-3 on cucumber excised leaf	Replicates											CU-1 on cotton excised leaf	Replicates											CU-2 on cotton excised leaf	Replicates
Day after aphids transplantation	1	2	3	4	5	6	7	8	9	10		Day after aphids transplantation	1	2	3	4	5	6	7	8	9	10		Day after aphids transplantation	1	2	3	4	5	6	7	8	9	10		Day after aphids transplantation	1	2	3	4	5	6	7	8	9	10		Day after aphids transplantation	1
1	40	40	40	40	40	40	40	40	40	40		1	40	40	40	40	40	40	40	40	40	40		1	40	40	40	40	40	40	40	40	40	40		1	40	40	40	40	40	40	40	40	40	40		1	40
4	41	24	48	40	13	62	36	28	34	69		4	39	56	58	44	34	35	36	55	49	43		4	104	33	17	55	22	31	38	28	30	47		4	9	3	0	0	0	0	0	0	0	1		4	0
7	35	20	11	24	4	29	34	32	43	40		7	41	42	37	29	23	35	43	55	58	35		7	91	28	11	65	18	32	33	40	34	45		7	2	0								0
10	23	10	4	21	6	9	37	20	24	25		10	33	27	30	17	12	17	20	30	55	15		10	53	11	6	47	3	16	23	27	30	27		10	0
13	5	2	1	10	5	2	7	10	7	4		13	26	20	13	5	4	2	4	10	35	4		13	30	4	0	35	2	13	15	26	10	3
16	2	0	0	3	4	0	6	5	2	1		16	25	17	11	2	1	1	1	5	12	2		16	15	0		28	0	1	4	23	5	1
19	0			0	2		4	1	0	0		19	38	6	5	0	0	0	0	0	6	0		19	7			13		0	0	24	0	0
22					3		2	0				22	27	2	4						2			22	6			4				10
25					0		0					25	20	0	1						0			25	1			8				2
												28	8		0									28	0			2				0
												31	6											31				0
												34	1
												37	0
[truncated: 20 more columns]

## Sheet: Raw data for Fig. 3
R	On excised leaf	On artificial diet
CO-1	0.273014	0.190885
CO-1	0.286995	0.189133
CO-1	0.301279	0.191068
CO-1	0.268098	0.195111
CO-1	0.289667	0.176779
CO-2	0.313373	0.0704239
CO-2	0.308568	0.108641
CO-2	0.274611	0.0393834
CO-2	0.306997	0.0555273
CO-2	0.26682	0.037266
CO-3	0.26854	0.0791085
CO-3	0.273452	0.0861756
CO-3	0.330282	0.0900614
CO-3	0.308063	0.0985319
CO-3	0.319459	0.0927046
CU-1	-	0.0896661
CU-1	0.359846	0.0886112
CU-1	0.372216	0.0699741
CU-1	0.373292	0.0440261
CU-1	0.371681	0.0640291
CU-2	0.367801	0.084643
CU-2	0.374183	0.087967
CU-2	0.374367	0.0762078
CU-2	0.365943	0.0691837
CU-2	0.383613	0.0526341
CU-3	0.300852	0.117656
CU-3	0.326686	0.112829
CU-3	0.274171	0.104781
CU-3	0.330078	0.116516
CU-3	0.335741	0.104866

## Sheet: Raw data for Fig. 4
Population sizes of six genotypic aphids on the natal host plant leaf(cotton or cucumber) and on an alternative host plant leaf (cotton or cucumber)after aphids were fed on the artificial diet for one generation.
Raw data for Fig. 4A
CO-1 on a cucumber leaf	Replications											CO-2 on a cucumber leaf	Replications											CO-3 on a cucumber leaf	Replications											CO-1 on a cotton leaf	Replications											CO-2 on a cotton leaf	Replications
Day after aphids transplantation	1	2	3	4	5	6	7	8	9	10		Day after aphids transplantation	1	2	3	4	5	6	7	8	9	10		Day after aphids transplantation	1	2	3	4	5	6	7	8	9	10		Day after aphids transplantation	1	2	3	4	5	6	7	8	9	10		Day after aphids transplantation	1
1	40	40	40	40	40	40	40	40	40	40		1	40	40	40	40	40	40	40	40	40	40		1	40	40	40	40	40	40	40	40	40	40		1	40	40	40	40	40	40	40	40	40	40		1	40
4	65	67	66	65	65	68	46	45	86	85		4	53	54	63	56	40	58	55	46	48	47		4	71	57	48	65	44	50	55	47	46	52		4	46	50	54	41	42	40	44	40	40	49		4	46
7	125	80	67	90	61	50	42	50	90	144		7	230	185	220	225	150	230	245	265	235	285		7	215	225	160	325	145	185	220	160	140	185		7	95	225	170	65	80	75	65	48	66	70		7	200
10	190	121	58	143	59	56	68	44	85	130		10	565	475	490	385	430	350	495	475	510	485		10	385	440	210	570	200	425	475	265	295	305		10	200	300	270	195	185	180	155	105	115	115		10	365
13	165	140	38	70	38	23	62	90	70	75		13	690	565	580	495	755	650	610	520	645	580		13	710	685	420	1000	385	595	580	395	515	620		13	225	355	285	275	265	255	275	215	350	250		13	470
16	110	115	12	61	14	8	50	43	26	41		16	760	795	695	585	885	795	735	685	805	695		16	825	795	705	1000	815	835	735	685	725	745		16	330	390	300	400	325	315	395	320	360	360		16	525
19	30	28	5	21	4	1	37	13	2	20
22	5	21	0	13	1	0	32	3	0	7
25	0	8		6	0		12	2		3
28		2		2			3	0		1
31		0		2			1			0
34				0			0
Raw data for Fig. 4B
CU-1 on a cotton leaf	Replications											CU-2 on a cotton leaf	Replications											CU-3 on a cotton leaf	Replications											CU-1 on a cucumber leaf	Replications						CU-2 on a cucumber leaf	Replications
Day after aphids transplantation	1	2	3	4	5	6	7	8	9	10		Day after aphids transplantation	1	2	3	4	5	6	7	8	9	10		Day after aphids transplantation	1	2	3	4	5	6	7	8	9	10		Day after aphids transplantation	1	2	3	4	5		Day after aphids transplantation	1	2	3	4	5	6
1	40	40	40	40	40	40	40	40	40	40		1	40	40	40	40	40	40	40	40	40	40		1	40	40	40	40	40	40	40	40	40	40		1	32	37	40	40	40		1	40	40	40	40	40	40
4	38	19	32	43	20	40	38	45	41	35		4	44	28	34	42	43	40	40	43	35	49		4	40	41	45	46	41	40	40	40	40	41		4	34	33	38	41	38		4	44	44	48	40	42	46
7	46	11	14	124	9	58	20	90	58	39		7	25	20	39	51	35	44	18	49	65	65		7	85	96	89	105	62	73	69	83	50	49		7	86	183	78	80	145		7	200	138	140	135	155	57
10	40	8	8	160	11	78	26	170	85	26		10	8	30	100	57	9	29	8	68	75	57		10	175	168	145	190	97	119	113	125	85	120		10	225	240	185	240	275		10	385	390	485	295	298	120
13	44	5	8	150	4	52	34	215	100	17		13	7	80	165	61	4	5	5	129	70	58		13	185	160	155	220	135	165	135	160	98	105		13	245	350	260	480	460		13	490	502	625	380	375	330
16	80	3	11	170	4	80	64	200	180	15		16	3	75	180	38	3	3	2	175	68	52		16	160	195	170	140	150	95	130	125	159	167		16	680	640	535	965	775		16	700	745	800	690	612	565
19	90	5	18	163	21	130	106	80	205	12		19	5	50	270	25	3	1	11	178	75	43		19	160	165	165	160	230	165	160	180	210	346
22	107	14	34	144	27	174	159	45	300	25		22	6	55	175	10	4	1	21	140	125	74		22	220	205	180	200	334	285	185	185	200	330
25	76	27	57	96	33	149	249	30	230	25		25	10	50	205	5	5	4	23	66	133	26		25	225	210	195	210	350	290	200	200	210	330
28	36	35	74	87	14	163	218	60	70	28		28	16	50	115	8	6	6	23	49	106	14
31	2	16	95	59	5	69	135	40	98	24		31	28	65	55	17	11	9	13	10	94	12
34	0	10	129	34	2	54	129	25	90	27		34	35	110	38	32	7	18	4	4	30	5
37		40	178	14	3	39	56	35	148	43		37	35	95	35	90	7	40	2	0	7	9
40		72	226	5	3	18	70	25	103	63		40	80	95	20	91	19	65	2		6	6
43		85	209	4	2	6	75	20	98	61		43	90	80	3	87	21	85	6		1	1
46		103	95	0	6	11	127	20	88	83		46	70	20	5	44	27	91	3		0	2
49		75	63		14	17	173	10	57	98		49	45	20	8	2	56	65	3			2
52		50	32		33	24	233	6	12	89		52	15	13	11	0	73	45	5			2
55		24	17		79	32	357	8	10	95		55	12	4	23		72	60	13			5
58		1	10		85	51	327	8	5	57		58	18	1	69		77	50	27			3
61		0	10		86	61	252	19	0	20		61	27	1	68		78	69	38			0
64			13		87	45	228	43		11		64	43	0	62		63	97	64
67			8		74	38	169	85		16		67	45		4		24	76	85
70			0		69	23	100	105		16		70	50		0		9	58	88
73					82	18	86	40		14		73	60				4	67	90
76					83	9	63	45		15		76	99				0	36	84
79					92	13	41	28		9		79	80					9	40
82					108	13	30	22		3		82	9					3	26
85					95	8	11	3		3		85	2					3	4
88					37	7	1	0		3		88	0					3	2
91					25	4	0			2		91						4	0
94					9	0				1		94						6
97					1					0		97						8
100					0							100						7
												103						1
												106						0
[truncated: 20 more columns]

## Sheet: Raw data for Fig. 5
Population sizes of three genotypes of aphids (CO-2,CO-3 and CU-3) on cotton and cucumber plants when they were fed on the alternative host leaf for more than 12 generations mediated by the artificial diet.
Raw data for Fig. 5A
CO-2 on a cucumber plant	Replications				CO-3 on a cucumber plant	Replications				CO-2 on a cotton plant	Replications				CO-3 on a cotton plant	Replications
Day after aphids transplantation	1	2	3		Day after aphids transplantation	1	2	3		Day after aphids transplantation	1	2	3		Day after aphids transplantation	1	2	3
1	20	20	20		1	20	20	20		1	20	20	20		1	20	20	20
3	11	15	10		3	10	14	10		3	79	58	78		3	68	75	59
5	10	5	5		5	0	15	4		5	105	115	93		5	93	105	87
7	2	3	7		7		10	3		7	140	160	135		7	112	144	102
9	0	0	4		9		7	3		9	220	245	230		9	235	225	186
11			3		11		1	0		11	320	275	405		11	241	420	260
13			2		13		2			13	505	420	545		13	395	565	380
15			2		15		0			15	640	560	665		15	765	680	645
17			0
Raw data for Fig. 5B
CU-3 on a cotton plant	Replications				CU-3 on a cucumber plant	Replications
Day after aphids transplantation	1	2	3		Day after aphids transplantation	1	2	3
1	20	20	20		1	20	20	20
3	48	52	52		3	53	68	59
5	37	48	50		5	89	115	99
7	55	57	64		7	148	173	135
9	50	63	86		9	180	230	305
11	52	53	90		11	355	485	525
13	50	56	120		13	665	745	620
15	58	53	152
17	63	57	215
19	55	49	220
21	53	33	220
23	53	33	205
25	48	20	155
27	47	20	176
29	52	20	220
31	40	20	245
33	40	20	299
35	45	15	325
37	40	15	385
39	40	15	420
41	58	10	535
43	57	10	705
45	57	10	810
47	67	10	1200
49	58	8	1250
51	57	8
53	50	8
55	48	8
57	68	7
59	65	5
61	62	5
63	58	6
65	58	6
67	55	7
69	56	7
71	55	13
73	53	25
75	56	27
77	50	32
79	50	145
81	52	340
83	53	285
85	53	435
87	54	740
89	51	1285
91	49	1300
93	46
95	42
97	60
99	58
101	56
103	65
105	76
107	62
109	53
111	120
113	320
115	380
117	465
119	540
121	750
123	1250
125	1680
